# Supplementary material for: Long noncoding RNA LCAT1 functions as a ceRNA to regulate RAC1 function by sponging miR-4715-5p in lung cancer
Source: PubMed Central journal article supplement (PMC6883523; doi:10.1186/s12943-019-1107-y), 2019-11-29
Supplement: 12943_2019_1107_MOESM1_ESM.pdf [file 12943_2019_1107_MOESM1_ESM.pdf]

**Table S1.** List of antibodies and primers used in this study

| <b>Antibodies</b> | <b>Catalogue Number</b>       | <b>Company</b>            |
|-------------------|-------------------------------|---------------------------|
| Wee1              | 13084                         | Cell Signaling Technology |
| CDK6              | 3136                          | Cell Signaling Technology |
| CyclinA2          | 4656                          | Cell Signaling Technology |
| CyclinB1          | 12231                         | Cell Signaling Technology |
| RAC1              | 66122-1-Ig                    | Proteintech               |
| CyclinD1          | 2978                          | Cell Signaling Technology |
| Pak1              | 2602                          | Cell Signaling Technology |
| P-pak1            | 2606                          | Cell Signaling Technology |
| Actin             | 4970                          | Cell Signaling Technology |
|                   |                               |                           |
| <b>Targets</b>    | <b>Primers</b>                | <b>Sequence(5'→3')</b>    |
| LCAT1             | Forward primer                | CACTTGGGATGCTGTTTGCC      |
|                   | Reverse primer                | AACGATTCCCTCCGTCCTG       |
| miR-4715-5p       | Forward primer                | AAGTTGGCTGCAGTTAAGGTGG    |
|                   | Reverse primer                | GTCGTATCCAGTGCAGGGT       |
| RAC1              | Forward primer                | CGATCCGAGCAGTCCTCT        |
|                   | Reverse primer                | GGGGCTGAGACATTTACAACA     |
| RAC1 3UTR         | Forward primer                | ACAACGGTGGAGCCTTCGCACT    |
|                   | Reverse primer                | CCTCCTAACTGCAGAAGCTACCG   |
| β-actin           | Forward primer                | GGCACCACACCTTCTACAAT      |
|                   | Reverse primer                | GCCTGGATAGCAACGTACAT      |
|                   |                               |                           |
| <b>Genes</b>      | <b>siRNA target sequences</b> |                           |
| LCAT1             | GCTCAGTCAATGGGAGATT           |                           |
|                   | CCAGAGTTACAGCCAATT            |                           |
| RAC1              | AGACGGAGCTGTAGGTAAA           |                           |
|                   | CCGAATGAAGCGTTGCCAT           |                           |
