# Supplementary material for: Long noncoding RNA LCAT1 functions as a ceRNA to regulate RAC1 function by sponging miR-4715-5p in lung cancer
Source: PubMed Central journal article supplement (PMC6883523; doi:10.1186/s12943-019-1107-y), 2019-11-29
Supplement: 12943_2019_1107_MOESM2_ESM.pdf [file 12943_2019_1107_MOESM2_ESM.pdf]

**Table S2.** Quality control metrics of the RNA sequencing libraries

| <b>Sample ID</b> | <b>Yield (Gb)</b> | <b># Reads</b> | <b>% of <math>\geq</math> Q30 Bases (PF)</b> | <b>Mean Quality Score (PF)</b> | <b>% of mapping rate</b> |
|------------------|-------------------|----------------|----------------------------------------------|--------------------------------|--------------------------|
| A549-NC-1        | 9.6               | 67,013,960     | 98.0                                         | 38.6                           | 93.7                     |
| A549-NC-2        | 6.9               | 47,052,538     | 97.4                                         | 38.3                           | 92.8                     |
| A549-NC-3        | 9.7               | 65,588,240     | 97.4                                         | 38.3                           | 91.8                     |
| A549-LCAT1-4-1   | 8.8               | 60,425,564     | 97.6                                         | 38.4                           | 92.8                     |
| A549-LCAT1-4-2   | 8.2               | 55,637,218     | 97.4                                         | 38.4                           | 93.6                     |
| A549-LCAT1-4-3   | 10.0              | 67,589,348     | 97.4                                         | 38.3                           | 92.3                     |
| Calu1-NC-1       | 8.4               | 57,051,966     | 97.6                                         | 38.5                           | 91.9                     |
| Calu1-NC-2       | 11.5              | 77,908,168     | 97.3                                         | 38.3                           | 92.4                     |
| Calu1-NC-3       | 10.4              | 70,428,980     | 97.1                                         | 38.2                           | 90.4                     |
| Calu1-LCAT1-4-1  | 9.5               | 64,882,604     | 97.8                                         | 38.5                           | 84.1                     |
| Calu1-LCAT1-4-2  | 5.8               | 39,557,248     | 97.1                                         | 38.2                           | 93.2                     |
| Calu1-LCAT1-4-3  | 8.5               | 58,380,246     | 97.5                                         | 38.4                           | 89.6                     |
| HOP62-NC-1       | 10.0              | 68,790,834     | 97.8                                         | 38.5                           | 92.8                     |
| HOP62-NC-2       | 10.4              | 70,828,680     | 97.4                                         | 38.3                           | 93.4                     |
| HOP62-NC-3       | 10.4              | 70,705,350     | 97.3                                         | 38.3                           | 91.7                     |
| HOP62-LCAT1-4-1  | 9.2               | 63,226,994     | 97.8                                         | 38.5                           | 92.2                     |
| HOP62-LCAT1-4-2  | 8.5               | 57,844,656     | 97.4                                         | 38.3                           | 93.1                     |
| HOP62-LCAT1-4-3  | 9.2               | 63,111,068     | 97.3                                         | 38.3                           | 91.7                     |
