# Supplementary material for: Long noncoding RNA LCAT1 functions as a ceRNA to regulate RAC1 function by sponging miR-4715-5p in lung cancer
Source: PubMed Central journal article supplement (PMC6883523; doi:10.1186/s12943-019-1107-y), 2019-11-29
Supplement: 12943_2019_1107_MOESM3_ESM.pdf [file 12943_2019_1107_MOESM3_ESM.pdf]

**Table S3.** Characteristics of lung cancer patient samples used in the study

| <b>Characteristics</b>   | <b>Number of cases</b> |
|--------------------------|------------------------|
| Age(years)               |                        |
| < 65                     | 10                     |
| ≥65                      | 15                     |
| Gender                   |                        |
| Male                     | 16                     |
| Female                   | 9                      |
| Tumor size               |                        |
| < 3                      | 12                     |
| ≥ 3                      | 13                     |
| Histology all types      |                        |
| Adenocarcinomas          | 18                     |
| Squamous cell carcinomas | 6                      |
| Others                   | 1                      |
