# Supplementary material for: Long noncoding RNA LCAT1 functions as a ceRNA to regulate RAC1 function by sponging miR-4715-5p in lung cancer
Source: Springer Nature journal article supplement (doi:10.1186/s12943-019-1107-y), 2019-11-29
Supplement: MOESM4 [file 17451510]

**A****5'RACE**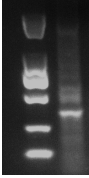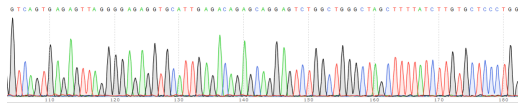**3'RACE**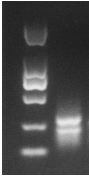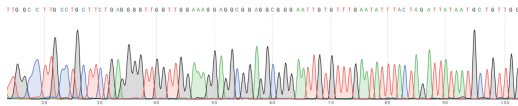**B****Full length of LCAT1**

5'-GTCAGTGAAGTTAGGGGAGAGGTGCATTGAGACAGAGCAG  
 GAGTCTGGCTGGGCTAGCTTTATCTTGTGCTCCCTGGAACCTG  
 ACTGGATGATTTCTGAAGTCGAGCTGGAGCCCATGAGAGGGAA  
 GGTGAACTTCTCTCAGCATGCAGGGCTCTGCACCCACTG  
 CCACAGCCACCGCATTACCAGCTCCTGCCAGTCTGAGGAGCAAGA  
 GGCTGGCATGAAGAATCAGTCCATTCTTCTCCCTAAATTTAGA  
 AAAAGCCTGTTTTGCAAAGCTTTCTCAGTGTTCAGACAAAAA  
 AAAAAAATTAAGCAGTTGCACAACATGCATATCTTCTCTGGCCT  
 GCAGCTCCAGGATATGCAGCTGGGAGCGAGTGTCCAGCCAACAG  
 CCGTGTCTCAGGCCCTGCCAGGGGATGAATCAATTAGCAAGAGA  
 AGCAATGATGCAAATGCTCCGGGGTCACTTGGGATGCTGTTTGC  
 TTTTGTAGAGAAAAGCACACATAAATACATCACACCTCAGGAA  
 ATCATTCCAGGAGGCCCGATGCTGGCAGGGCTGCTGCCAGGGAC  
 GGAAGGAATCGTTTGTCTATTGTGTATTTCCTCCAGCTCAGTCAA  
 TGGGAGATTTGTAGTAAATCAAAGTATTAAAGGAGGACAGTAT  
 GTGGTACAGAGGCATGTTAGCAATTTTTTGTACCAGAACCTGT  
 GATTATGACCCAGAGTTACAGCCAATTTATTACAAAAATGACTTCA  
 CCCATAAACCCTTATTCAGGGCCCTCTGATGAATGATGATATCCAA  
 CAGCATTATAATCTAGTAAATTTCAAAACACAATTCCTCCGCTCCGCTC  
 ATTCCAACCAACCCTCAGAAGCAGG-3'
