# Supplementary material for: Long noncoding RNA LCAT1 functions as a ceRNA to regulate RAC1 function by sponging miR-4715-5p in lung cancer
Source: Springer Nature journal article supplement (doi:10.1186/s12943-019-1107-y), 2019-11-29

**A**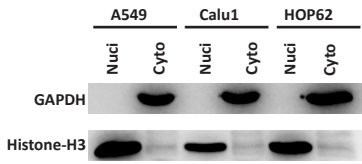**B**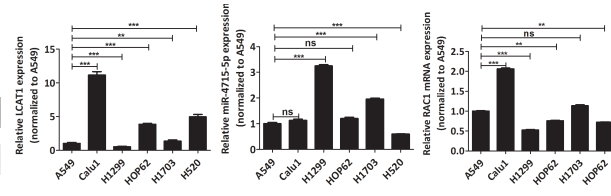**C**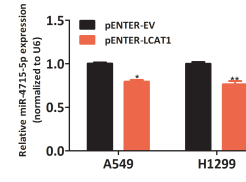**D**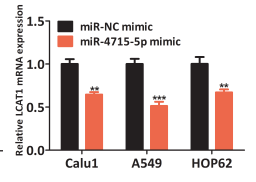**E**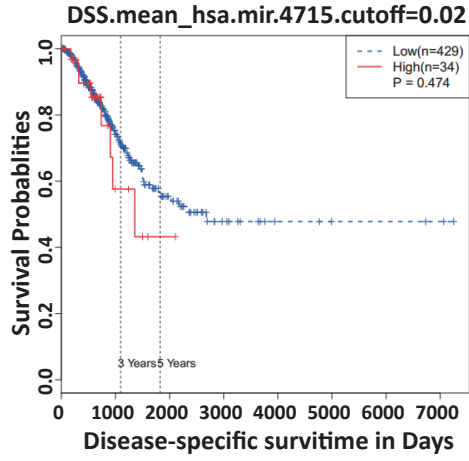**F**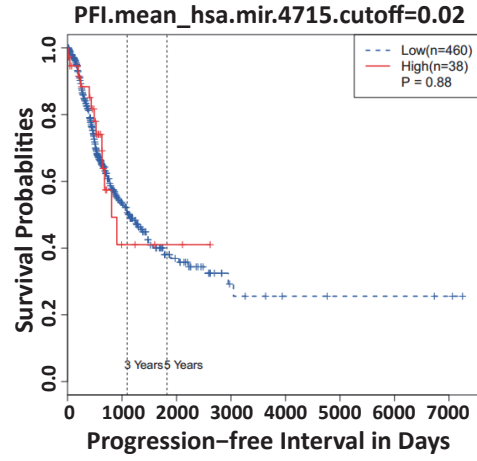

Supplement: MOESM7 [file 17451510]
